# Supplementary material for: Smart micelle@polydopamine core–shell nanoparticles for highly effective chemo–photothermal combination therapy
Source: Royal Society of Chemistry journal article supplement (doi:10.1039/c5nr04828a), 2015-01-01
Supplement: c5nr04828a1.pdf [file c5nr04828a1.pdf]

## Supplementary Information

### **Smart micelle@polydopamine core-shell nanoparticles for highly effective chemo-photothermal combination therapy**

Ruirui Zhang, †<sup>a</sup> Shishuai Su, †<sup>a</sup> Kelei Hu,<sup>ab</sup> Leihou Shao,<sup>a</sup> Xiongwei Deng,<sup>ab</sup> Wang Sheng<sup>\*b</sup> and Yan Wu<sup>\*a</sup>

<sup>a</sup> CAS Key Laboratory for Biomedical Effects of Nanomaterials and Nanosafety, National Center for Nanoscience and Technology of China  
No. 11 Beiyitiao, Zhongguancun, Beijing 100190, PR China

<sup>b</sup> College of Life Science and bioengineering, Beijing University of Technology, No. 100 Pingleyuan, Beijing 100124, PR China

†These authors contributed equally to this work.

\*To whom correspondence should be addressed.

Correspondence and requests for materials should be addressed to W. Sheng and Y. Wu (email:

shengwang@bjut.edu.cn; wuy@nanoctr.cn)

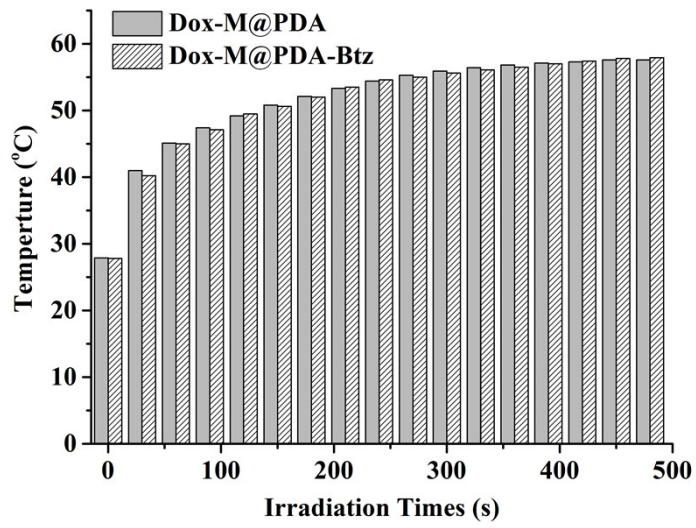

**Figure S1.** Photothermal heating curves of Dox-M@PDA and Dox-M@PDA-Btz at various power intensities with PDA concentration at 0.36 mg/mL.

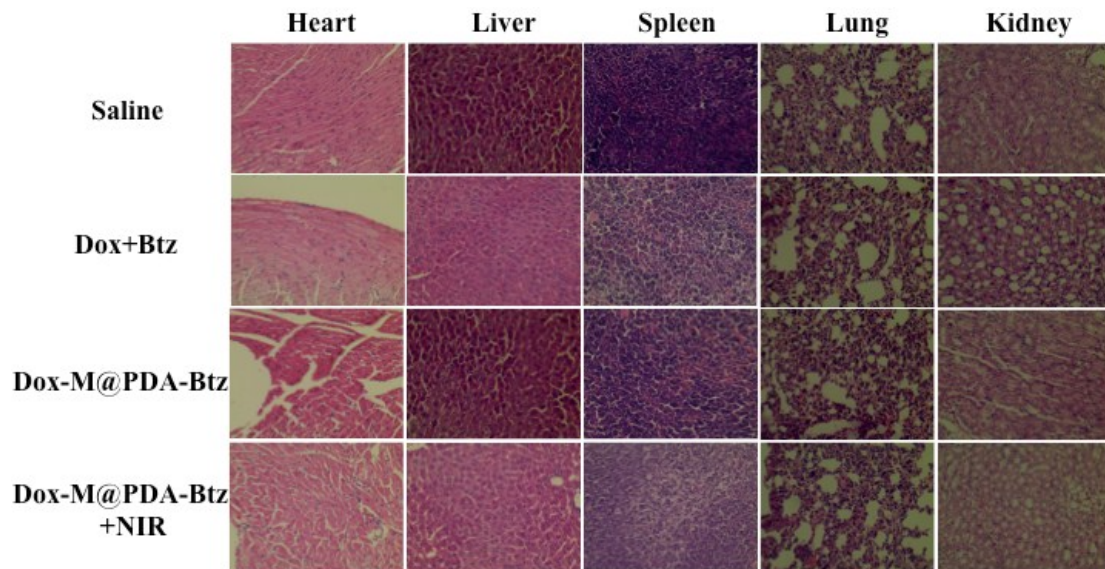

**Figure S2.** Representative H&E staining of various organs of tumor-bearing BALB/c mice after treatment with saline, Dox + Btz, Dox-M@PDA-Btz or Dox-M@PDA-Btz + NIR.
